# Supplementary material for: Dissociable contributions of ventromedial prefrontal and posterior parietal cortex to value-guided choice
Source: Neuroimage. 2014 Oct 15;100:498–506. doi: 10.1016/j.neuroimage.2014.06.005 (PMC4148525; doi:10.1016/j.neuroimage.2014.06.005)
Supplement: Supplementary file 1 — Supplementary material [file mmc1.pdf]

## **Dissociable contributions of ventromedial prefrontal and posterior parietal cortex to value-guided choice**

Gerhard Jocham<sup>1</sup>, P Michael Furlong<sup>4</sup>, Inga L Kröger<sup>5</sup>, Martin C Kahn<sup>6</sup>, Laurence T Hunt<sup>1,2</sup>, Tim EJ Behrens<sup>1,3</sup>

- 1) FMRIB Centre, University of Oxford, John Radcliffe Hospital, Oxford OX3 9DU, United Kingdom
- 2) Department of Experimental Psychology, University of Oxford, South Parks Road, Oxford OX1 3UD, United Kingdom
- 3) Wellcome Trust Centre for Neuroimaging, University College London, 12 Queen Square, London WC1N 3BG
- 4) The Robotics Institute, Carnegie Mellon University, Pittsburgh, PA, USA
- 5) Department of Systems Neuroscience, University of Hamburg, UKE, Martinistrasse 52, 20246 Hamburg, Germany
- 6) Graduate Programme in Neuroscience, University of Oxford

To whom correspondence should be addressed: [gjocham@fmrib.ox.ac.uk](mailto:gjocham@fmrib.ox.ac.uk)

Supplementary results, supplementary references

Supplementary Figures 1 – 2

Supplementary Table 1

## Supplementary results

In addition to our main regions of interest, we also tested for differences between conditions in MCC and PCC. The MCC followed similar temporal dependencies as pSPL. A value difference correlate was found in *short* and *middle* ( $t_{27} > 2.09$ ,  $p < 0.025$ ), but not in *long* ( $p > 0.29$ , supplementary Fig. S1), and this correlation tended to be more pronounced in *short* compared to *long* ( $t_{27} > 1.55$ ,  $p = 0.066$ ). Notably, further decomposition revealed that a significant negative unchosen value effect could be observed for both *short* and *middle* ( $t_{27} > 2.03$ ,  $p = 0.027$ ) but not *long* ( $p > 0.44$ ). In contrast, a significant positive chosen value effect was only present as a trend for *short* ( $t_{27} = 1.46$ ,  $p = 0.078$ ) but not for *middle* and *long* ( $p > 0.22$ , supplementary Fig. S1). Thus, value difference coding in MCC was primarily driven by an unchosen value effect, with only a weak contribution of chosen value coding in *short*. In PCC, finally, robust value difference coding was present in all three conditions ( $t_{27} > 1.95$ ,  $p < 0.031$ , supplementary Fig. S2) and this was more pronounced in *middle* compared to *long* ( $t_{27} > 2.49$ ,  $p = 0.019$ , supplementary Fig. S2). A chosen value effect was present in all conditions ( $t_{27} > 2.37$ ,  $p = 0.015$ ). In contrast, a negative unchosen value effect was only present in *middle* ( $t_{27} = 5.25$ ,  $p < 0.00001$ ) and *short* ( $t_{27} = 1.86$ ,  $p = 0.038$ ), but not in *long* ( $p=0.13$ ).

Thus, while the MCC followed the same pattern of temporal dependence as pSPL, PCC did not show such dependence at all. Instead, in PCC, a value difference signal was observed in all conditions, irrespective of the temporal requirements. The functional significance of these findings is unclear. PCC has been found to correlate with the subjective value of the chosen option in both fMRI (Kable and Glimcher, 2007; Levy and Glimcher, 2011) and single unit studies (McCoy and Platt, 2005); it is also typically found as part of the default mode network that also includes vmPFC (Gusnard et al., 2001; Raichle et al., 2001), but functional dissociations between these two interconnected regions have been relatively sparse.

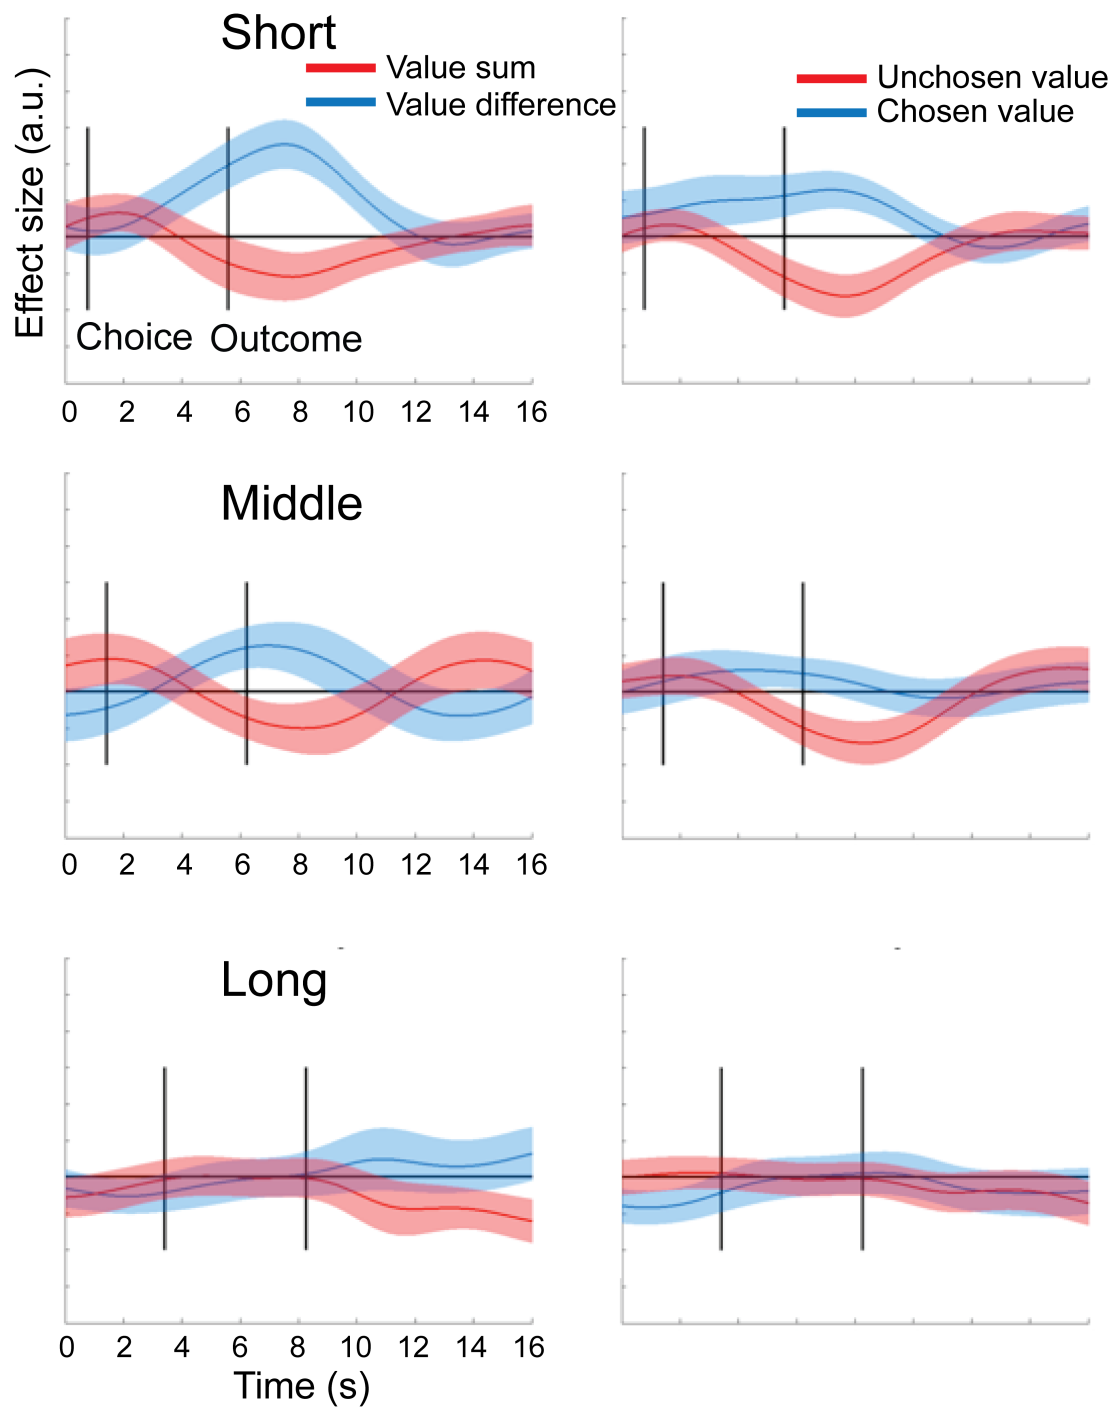

Figure S1) Timecourse of value-related effects in the midcingulate cortex (MCC) over the course of a trial in the three conditions. Left column: effects of value difference and value sum on BOLD activity in MCC. Right column: Effects of chosen and unchosen option value on MCC BOLD activity. Solid lines represent mean effect sizes across participants, shaded areas are standard error of the mean.

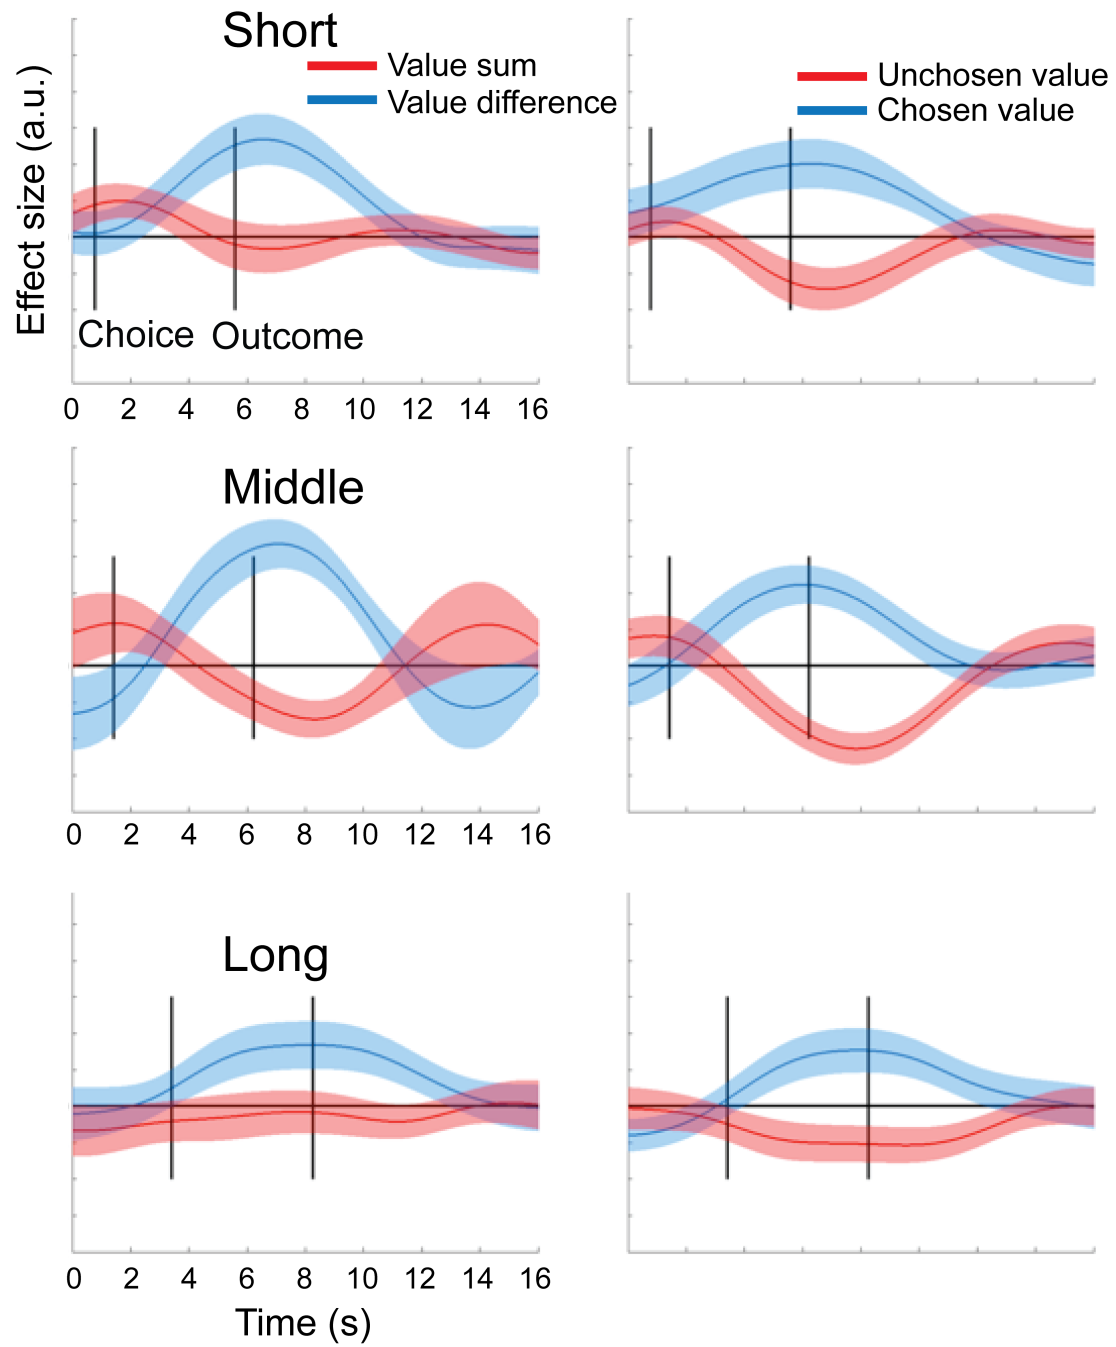

Figure S2) Timecourse of value-related effects in the posterior cingulate cortex (PCC) over the course of a trial in the three conditions. Left column: effects of value difference and value sum on BOLD activity in PCC. Right column: Effects of chosen and unchosen option value on PCC BOLD activity. Solid lines represent mean effect sizes across participants, shaded areas are standard error of the mean.

Table S1: All activations for the contrast "value difference" and "inverse value difference (= – negative correlation with value difference) obtained at  $p < 0.001$ , uncorrected.

| Contrast                 | Anatomical region                                       | Cluster size (mm <sup>3</sup> ) | Maximum Z score | Peak coordinates (MNI xyz) |
|--------------------------|---------------------------------------------------------|---------------------------------|-----------------|----------------------------|
| Value Difference         | right TPJ                                               | 303                             | 4.08            | 54, –38, 22                |
|                          | left posterior superior temporal sulcus                 | 264                             | 4.18            | –50, –54, 18               |
|                          | left TPJ (Heschl Gyrus?)                                | 148                             | 3.9             | –54, –32, 22               |
|                          | right anterior occipital sulcus                         | 130                             | 4.16            | 54, –56, 10                |
|                          | BA 25/32 / subgenual anterior cingulate cortex          | 91                              | 4.66            | 4, 24, –6                  |
|                          | left insular cortex                                     | 75                              | 4.1             | –46, –2, –8                |
|                          | right insular cortex                                    | 69                              | 3.85            | 46, –2, 4                  |
|                          | pregenual anterior cingulate cortex                     | 52                              | 4.02            | 0, 38, 0                   |
|                          | ventromedial prefrontal cortex                          | 52                              | 4.03            | –2, 28, –18                |
|                          | posterior cingulate cortex                              | 50                              | 3.73            | –6, –46, 34                |
|                          | left rostral middle temporal gyrus                      | 50                              | 3.63            | –60, –6, –16               |
|                          | left parahippocampal gyrus                              | 34                              | 3.86            | –32, –44, –8               |
|                          | left anterior occipital sulcus                          | 32                              | 3.46            | –48, –68, 12               |
|                          | precuneus                                               | 31                              | 3.5             | –8, –58, 18                |
|                          | right rostral superior temporal sulcus                  | 27                              | 3.65            | 50, –2, –16                |
|                          | right parahippocampal gyrus                             | 16                              | 3.79            | 34, –44, –8                |
| Inverse Value Difference | right intraparietal sulcus                              | 5008                            | 5.97            | 46, –36, 46                |
|                          | left occipital cortex                                   | 3740                            | 5.68            | –30, –96, –10              |
|                          | right anterior insula                                   | 2632                            | 5.85            | 36, 20, –8                 |
|                          | medial prefrontal cortex (anterior midcingulate cortex) | 2502                            | 7.06            | –4, 26, 38                 |
|                          | GPI / caudate (bilateral)                               | 1090                            | 4.66            | –10, –2, 0                 |
|                          | left inferior frontal sulcus                            | 874                             | 5.19            | –40, 2, 30                 |
|                          | left anterior insula                                    | 742                             | 5.49            | –32, 16, 2                 |
|                          | right superior frontal sulcus                           | 721                             | 5.4             | 30, 0, 52                  |
|                          | left cerebellum                                         | 275                             | 4.51            | –8, –74, –34               |
|                          | lateral midbrain (right)                                | 177                             | 4.3             | 10, –28, –10               |
|                          | right calcarine sulcus                                  | 171                             | 3.64            | 14, –72, 6                 |
|                          | left inferior frontal gyrus                             | 160                             | 4.2             | –44, 36, 14                |
|                          | right cerebellum                                        | 150                             | 4.51            | 8, –76, –28                |
|                          | left BA 11                                              | 111                             | 4               | –40, 44, –10               |
|                          | left calcarine sulcus                                   | 57                              | 3.55            | –10, –80, –2               |
|                          | right lateral orbitofrontal cortex                      | 48                              | 4.23            | 26, 46, –16                |
|                          | left lateral orbitofrontal cortex                       | 20                              | 3.57            | –22, 44, –16               |

## **Supplementary references**

Gusnard DA, Raichle ME, Raichle ME (2001) Searching for a baseline: functional imaging and the resting human brain. *Nature reviews Neuroscience* 2:685-694.

Kable JW, Glimcher PW (2007) The neural correlates of subjective value during intertemporal choice. *Nat Neurosci* 10:1625-1633.

Levy DJ, Glimcher PW (2011) Comparing apples and oranges: using reward-specific and reward-general subjective value representation in the brain. *J Neurosci* 31:14693-14707.

McCoy AN, Platt ML (2005) Risk-sensitive neurons in macaque posterior cingulate cortex. *Nat Neurosci* 8:1220-1227.

Raichle ME, MacLeod AM, Snyder AZ, Powers WJ, Gusnard DA, Shulman GL (2001) A default mode of brain function. *Proc Natl Acad Sci U S A* 98:676-682.
